# Supplementary material for: In Vitro Generation of Neuromesodermal Progenitors Reveals Distinct Roles for Wnt Signalling in the Specification of Spinal Cord and Paraxial Mesoderm Identity
Source: PLoS Biol. 2014 Aug 26;12(8):e1001937. doi: 10.1371/journal.pbio.1001937 (PMC4144800; doi:10.1371/journal.pbio.1001937)
Supplement: Data S1 — Data used to generate plots in Figure 1 . (XLSX) [file pbio.1001937.s009.xlsx]

## Sheet: Figure 1B
FIGURE 1	RNA-seq normalized reads
PANEL B	Neural anterior
		Exp1	Exp2	Exp3	Exp1	Exp2	Exp3	Exp1	Exp2	Exp3
		NA	NA	NA	NH	NH	NH	NP	NP	NP
	Otx2	2936	3261	4960	175	177	114	8	5	8
	Otx1	854	878	1492	3	12	4	0	0	1
	Sim2	416	644	1043	9	20	5	2	1	2
	Six3	319	402	464	7	13	4	0	2	0
	Wnt1	678	852	1435	36	57	38	71	146	124
	Lhx5	326	363	536	4	7	4	3	5	0
	En1	1190	1475	2246	24	26	24	47	29	32
		Exp1	Exp2	Exp3	Exp1	Exp2	Exp3	Exp1	Exp2	Exp3
	Z-scores	NA	NA	NA	NH	NH	NH	NP	NP	NP
	Otx2	0.916977	1.09845	2.04713	-0.624699	-0.623582	-0.658759	-0.717947	-0.719622	-0.717947
	Otx1	0.925932	0.970957	2.12285	-0.670581	-0.653697	-0.668705	-0.67621	-0.67621	-0.674334
	Sim2	0.494453	1.1278	2.23615	-0.636122	-0.605566	-0.647233	-0.655567	-0.658345	-0.655567
	Six3	0.98441	1.42739	1.7583	-0.680785	-0.648762	-0.696796	-0.718145	-0.707471	-0.718145
	Wnt1	0.631314	1.00228	2.24525	-0.737441	-0.692668	-0.733177	-0.66282	-0.502919	-0.549823
	Lhx5	0.946713	1.1337	2.00798	-0.680555	-0.665394	-0.680555	-0.685609	-0.675502	-0.70077
	En1	0.780134	1.13638	2.10013	-0.677357	-0.674857	-0.677357	-0.648607	-0.671107	-0.667357
	Hindbrain	RNA seq values
		Exp1	Exp2	Exp3	Exp1	Exp2	Exp3	Exp1	Exp2	Exp3
		NA	NA	NA	NH	NH	NH	NP	NP	NP
	Mafb	141	242	253	2532	478	2044	544	452	465
	Epha4	1247	1364	2350	3097	1072	2478	992	595	1044
	Ephb2	2215	2717	4874	4745	4226	3933	2143	1396	1800
	Hoxa2	202	245	400	756	483	648	512	599	460
	Hoxb2	33	55	74	181	285	160	240	261	252
	Hoxc4	122	128	191	515	771	392	744	1170	1061
	Z-scores
	Mafb	-0.800806	-0.67705	-0.663572	2.1289	-0.387878	1.53095	-0.307007	-0.419736	-0.403807
	Epha4	-0.420372	-0.273604	0.96326	1.90032	-0.639897	1.12383	-0.740251	-1.23826	-0.67502
	Ephb2	-0.716439	-0.317515	1.39659	1.29408	0.881642	0.648804	-0.773655	-1.36727	-1.04623
	Hoxa2	-1.62932	-1.37578	-0.461871	1.63718	0.0275157	1.00039	0.198506	0.711477	-0.108097
	Hoxb2	-1.51874	-1.27701	-1.06824	0.107435	1.25015	-0.123306	0.755706	0.986446	0.887557
	Hoxc4	-1.19327	-1.17715	-1.00783	-0.137065	0.550948	-0.467634	0.478384	1.62328	1.33034
	Spinal Cord
		Exp1	Exp2	Exp3	Exp1	Exp2	Exp3	Exp1	Exp2	Exp3
		NA	NA	NA	NH	NH	NH	NP	NP	NP
	Hoxb6	63	65	92	11	16	7	525	721	527
	Hoxb8	51	38	80	6	9	2	564	598	554
	Hoxb9	713	855	1122	33	47	26	7910	10328	9001
	Hoxc6	56	75	124	25	17	15	447	662	496
	Hoxc8	60	65	78	22	7	19	278	546	456
	Hoxc9	29	39	24	0	1	1	130	147	61
		Exp1	Exp2	Exp3	Exp1	Exp2	Exp3	Exp1	Exp2	Exp3
	Z-scores	NA	NA	NA	NH	NH	NH	NP	NP	NP
	Hoxb6	-0.611324	-0.603787	-0.502039	-0.807283	-0.78844	-0.822356	1.12969	1.86831	1.13723
	Hoxb8	-0.625559	-0.67628	-0.512412	-0.801132	-0.789427	-0.816738	1.37597	1.50862	1.33695
	Hoxb9	-0.637463	-0.602969	-0.538111	-0.802645	-0.799244	-0.804346	1.1108	1.69816	1.37582
	Hoxc6	-0.665414	-0.584886	-0.377209	-0.796801	-0.830707	-0.839184	0.991763	1.903	1.19944
	Hoxc8	-0.568444	-0.542632	-0.47552	-0.764617	-0.842054	-0.780105	0.556972	1.94051	1.47589
	Hoxc9	-0.364651	-0.172729	-0.460612	-0.921224	-0.902032	-0.902032	1.57376	1.90002	0.249498

## Sheet: Figure 1C
Figure 1	RNA-seq normalized reads
PANEL C
NH	Exp1	Exp2	Exp3	Exp1	Exp2	Exp3	Exp1	Exp2	Exp3	Exp1	Exp2	Exp3	Exp1	Exp2	Exp3
DAYS	Hoxb1	Hoxb1	Hoxb1	Hoxb2	Hoxb2	Hoxb2	Hoxb4	Hoxb4	Hoxb4	Hoxb6	Hoxb6	Hoxb6	Hoxb8	Hoxb8	Hoxb8
1	22.3123	13.5327	25.5478	2.78904	1.69158	1.64824	29.7497	17.7616	20.603	27.8904	28.7569	26.3719	3.71872	2.53738	4.94473
2	108.359	79.5943	71.9444	4.88105	5.24797	5.92483	12.6907	12.2453	13.5425	15.6193	13.1199	16.9281	9.76209	8.74662	11.0033
3	59.9648	129.473	127.767	8.75891	14.6022	15.5995	16.1703	34.0718	25.2563	20.2129	29.2044	11.8853	6.06386	12.6553	2.97133
4	385.646	400.743	268.399	83.8717	89.4515	50.7284	88.8054	90.1671	69.1751	14.8009	7.15612	11.9903	18.9123	9.30296	7.37868
5	99.8816	197.09	118.276	127.314	267.48	134.214	275.73	723.604	285.204	7.73731	15.0164	5.87184	4.22035	8.44673	1.67767
NH	Exp1	Exp2	Exp3	Exp1	Exp2	Exp3	Exp1	Exp2	Exp3	Exp1	Exp2	Exp3
DAYS	Hoxc4	Hoxc4	Hoxc4	Hoxc6	Hoxc6	Hoxc6	Hoxc8	Hoxc8	Hoxc8	Hoxc9	Hoxc9	Hoxc9
1	11.1562	12.6869	18.1307	52.062	53.2849	49.4473	33.4684	32.9859	25.5478	8.36711	5.07475	7.41709
2	8.78588	9.62128	3.38562	23.429	14.8693	26.2386	20.5004	26.2399	18.6209	6.83346	6.12263	6.77124
3	12.8015	20.4431	8.17116	22.2341	34.0718	15.5995	27.6242	63.2763	9.65682	8.75891	20.4431	2.2285
4	38.6468	40.7899	42.4274	6.57818	17.1747	19.369	13.1563	11.4498	14.7574	3	4	1
5	362.247	723.604	328.823	17.5848	15.9549	12.5825	15.4746	6.56968	15.9379	1	3	2
NP	Exp1	Exp2	Exp3	Exp1	Exp2	Exp3	Exp1	Exp2	Exp3	Exp1	Exp2	Exp3	Exp1	Exp2	Exp3
DAYS	Hoxb1	Hoxb1	Hoxb1	Hoxb2	Hoxb2	Hoxb2	Hoxb4	Hoxb4	Hoxb4	Hoxb6	Hoxb6	Hoxb6	Hoxb8	Hoxb8	Hoxb8
1	22.3123	13.5327	25.5478	2.78904	1.69158	1.64824	29.7497	17.7616	20.603	27.8904	28.7569	26.3719	3.71872	2.53738	4.94473
2	108.359	79.5943	71.9444	4.88105	5.24797	5.92483	12.6907	12.2453	13.5425	15.6193	13.1199	16.9281	9.76209	8.74662	11.0033
3	7693.43	7445.8	8435.8	186.397	171.957	205.882	285.369	252.688	297.682	61.8575	73.4651	76.6486	62.6823	54.897	83.7787
4	5232.97	5248.49	4631.1	509.536	518.712	588.004	1470.96	1371.18	1549.78	879.601	859.196	1036.53	606.236	627.162	839.615
5	720.464	1119.54	745.21	213.208	267.582	246.124	1169.98	1196.43	1128.07	466.392	739.181	514.712	501.038	613.079	541.083
NP	Exp1	Exp2	Exp3	Exp1	Exp2	Exp3	Exp1	Exp2	Exp3	Exp1	Exp2	Exp3
DAYS	Hoxc4	Hoxc4	Hoxc4	Hoxc6	Hoxc6	Hoxc6	Hoxc8	Hoxc8	Hoxc8	Hoxc9	Hoxc9	Hoxc9
1	11.1562	12.6869	18.1307	52.062	53.2849	49.4473	33.4684	32.9859	25.5478	8.36711	5.07475	7.41709
2	8.78588	9.62128	3.38562	23.429	14.8693	26.2386	20.5004	26.2399	18.6209	6.83346	6.12263	6.77124
3	156.706	175.186	175.579	19.7944	19.3754	27.6291	17.3201	25.0266	27.6291	4.12383	4.84385	1.78253
4	1283.14	1160.17	1564.36	447.239	361.501	526.013	794.988	778.488	1210.65	92.0512	100.043	102.103
5	660.943	1199.5	1036.26	397.099	678.693	484.435	246.965	559.768	445.368	34.6462	150.707	59.5777

## Sheet: Figure 1F
Figure 1		RNA-seq normalized reads
Panel F		Exp1	Exp2	Exp3	Exp1	Exp2	Exp3	Exp1	Exp2	Exp3
		DAY1	DAY1	DAY1	DAY2	DAY2	DAY2	DAY3	DAY3	DAY3
	Zfp42	2475.74	2664.24	2577.85	324.101	293.012	384.268	278.937	325.143	131.481
	Fgf5	1969.99	1933.48	1895.48	4848.83	4610.34	4744.1	3706.36	3996.14	2885.16
	Pou5f1	27172.7	27500.9	27101.2	21926.6	21335.6	24269.8	11238.3	12283.4	11204.1
		Exp1	Exp2	Exp3	Exp1	Exp2	Exp3	Exp1	Exp2	Exp3
	Z-scores	DAY1	DAY1	DAY1	DAY2	DAY2	DAY2	DAY3	DAY3	DAY3
	Zfp42	1.24523	1.40993	1.33445	-0.634695	-0.661859	-0.582127	-0.674156	-0.633785	-0.802991
	Fgf5	-1.1411	-1.17025	-1.2006	1.15792	0.967468	1.07428	0.245557	0.476971	-0.410249
	Pou5f1	0.958531	1.00532	0.948348	0.210754	0.126513	0.544755	-1.31277	-1.16381	-1.31765

## Sheet: Figure 1G
Figure 1
PANEL G
		Number of cells
		Hoxc6+	Hoxc6+ / Tuj1+	% of Hoxc6 cells that are neurons
	Field 1	125	119	95.2
	Field 2	170	145	85.2941
	Field 3	85	71	83.5294
	Field 4	140	117	83.5714
	Field 5	92	86	93.4783
		Cell counts
		Hoxc9+	Hoxc9+ / Tuj1+	% of Hoxc9 cells that are neurons
	Field 1	51	43	84.3137
	Field 2	671	631	94.0387
	Field 3	690	640	92.7536
	Field 4	210	184	87.619
	Field 5	342	310	90.6433
