# Supplementary material for: In Vitro Generation of Neuromesodermal Progenitors Reveals Distinct Roles for Wnt Signalling in the Specification of Spinal Cord and Paraxial Mesoderm Identity
Source: PLoS Biol. 2014 Aug 26;12(8):e1001937. doi: 10.1371/journal.pbio.1001937 (PMC4144800; doi:10.1371/journal.pbio.1001937)
Supplement: Data S9 — Data used to generate plots in Figure S4. (XLS) [file pbio.1001937.s017.xls]

## Sheet: Figure S4A
Figure S4
Panel A
Fgf2 (20ng/ml)+CHIR(3 uM)
	Number of cells (% total cells)
	T+Sox2+	T+Sox2-	T-Sox2+	T-Sox2-	Total cells scored
Field 1	207(53)	88(23)	65(17)	27(7)	387(100)
Field 2	267(53)	150(30)	13(3)	75(14)	505(100)
Field 3	278(66)	17(4)	112(27)	12(3)	419(100)
Field 4	184(63)	23(8)	80(27)	5(2)	292(100)
Field 5	134(31)	155(35)	86(20)	63(14)	438(100)
Field 6	139(35)	11(3)	241(61)	5(1)	396(100)
Field 7	107(36)	9(3)	170(57)	14(4)	300(100)
Field 8	236(54)	98(23)	70(16)	30(7)	434(100)
Field 9	267(51)	126(24)	79(15)	52(10)	524(100)
Field 10	473(74)	124(19)	21(3)	21(4)	639(100)
Total	2292(51.6)	801(17.2)	937(24.6)	304(6.6)	4334(100)
StDV (for percentages)	13.3881	11.2232	18.8796	4.47661
Fgf2 (10ng/ml)+CHIR(3 uM)
	Number of cells (% total cells)
	T+Sox2+	T+Sox2-	T-Sox2+	T-Sox2-	Total cells scored
Field 1	276(74)	38(10)	49(13)	12(3)	375(100)
Field 2	105(22)	100(21)	140(30)	123(27)	468(100)
Field 3	199(44)	121(26)	72(16)	65(14)	457(100)
Field 4	77(22)	58(17)	66(19)	147(42)	348(100)
Field 5	55(9)	57(9)	366(59)	145(23)	623(100)
Field 6	34(10)	21(6)	153(45)	130(39)	338(100)
Field 7	163(24)	89(13)	256(38)	166(25)	674(100)
Field 8	132(20)	97(15)	232(36)	192(29)	653(100)
Total	1041(28.125)	591(14.625)	1334(32)	980(25.25)	3936(100)
StDV (for percentages)	20.0277	6.1834	14.7479	11.7978
Fgf2 (5ng/ml)+CHIR(3 uM)
	Number of cells (% total cells)
	T+Sox2+	T+Sox2-	T-Sox2+	T-Sox2-	Total cells scored
Field 1	214(43)	23(4)	276(52)	7(1)	520(100)
Field 2	26(7)	79(21)	221(59)	51(13)	377(100)
Field 3	43(9)	63(13)	254(52)	132(26)	492(100)
Field 4	76(30)	136(53)	24(9)	19(8)	255(100)
Field 5	45(9)	6(1)	341(69)	104(21)	496(100)
Field 6	173(27)	76(12)	298(47)	86(14)	633(100)
Field 7	40(6)	73(10)	443(62)	164(22)	720(100)
Total cells(average%)	617(19.2857142857143)	456(15.7142857142857)	1857(50)	563(15)	3493(100)
StDV (for percentages)	13.1444	16.3158	18.0634	8.07111
Fgf2 (2ng/ml)+CHIR(3 uM)
	Number of cells (% total cells)
	T+Sox2+	T+Sox2-	T-Sox2+	T-Sox2-	Total cells scored
Field 1	40(7)	51(9)	391(66)	109(18)	591(100)
Field 2	5(2)	5(2)	172(77)	42(19)	224(100)
Field 3	47(9)	11(2)	410(77)	66(12)	534(100)
Field 4	29(6)	15(3)	284(59)	157(32)	485(100)
Total cells(average%)	121(6)	82(4)	1257(69.75)	374(20.25)	1834(100)
StDV (for percentages)	2.54951	2.91548	7.66078	7.29298
Fgf2 (10 ng/ml)+CHIR(5 uM)
	Number of cells (% total cells)
	T+Sox2+	T+Sox2-	T-Sox2+	T-Sox2-	Total cells scored
Field 1	54(15)	182(50)	54(15)	74(20)	364(100)
Field 2	227(48)	184(39)	17(4)	44(9)	472(100)
Field 3	165(32)	284(55)	17(3)	55(11)	521(100)
Field 4	37(18)	164(78)	3(1)	7(3)	211(100)
Field 5	32(14)	130(58)	9(4)	53(24)	224(100)
Field 6	36(12)	223(72)	32(10)	20(6)	311(100)
Field 7	127(41)	81(26)	31(10)	73(23)	312(100)
Field 8	22(10)	155(72)	6(3)	31(14)	214(100)
Field 9	105(47)	115(51)	3(1)	2(1)	225(100)
Field 10	414(47)	349(39)	44(5)	78(9)	885(100)
Total cells(average%)	1219(28.7)	1867(53.8)	216(5.6)	437(12)	3739(100)
StDV (for percentages)	14.9937	15.5936	4.34051	7.68115
Fgf2 (10 ng/ml)+CHIR(1 uM)
	Number of cells (% total cells)
	T+Sox2+	T+Sox2-	T-Sox2+	T-Sox2-	Total cells scored
Field 1	55(14)	15(4)	310(77)	24(5)	404(100)
Field 2	149(42)	40(11)	136(39)	27(8)	352(100)
Field 3	2(1)	19(6)	250(76)	59(17)	330(100)
Field 4	29(15)	0(0)	157(81)	9(4)	195(100)
Field 5	187(33)	34(6)	279(49)	69(12)	569(100)
Field 6	76(21)	29(8)	163(44)	101(27)	369(100)
Field 7	334(57)	71(12)	142(24)	43(7)	590(100)
Field 8	9(2)	31(6)	395(83)	42(9)	477(100)
Total cells(average%)	841(23.125)	239(6.625)	1832(59.125)	374(11.125)	3286(100)
StDV (for percentages)	18.3401	3.56853	21.2805	7.13158
Fgf2 (10 ng/ml)+CHIR(1 uM)
	Number of cells (% total cells)
	T+Sox2+	T+Sox2-	T-Sox2+	T-Sox2-	Total cells scored
Field 1	57(34)	5(3)	74(45)	30(18)	166(100)
Field 2	182(34)	72(14)	250(47)	24(5)	528(100)
Field 3	34(10)	6(2)	271(83)	15(5)	326(100)
Field 4	99(30)	41(12)	150(45)	45(13)	335(100)
Field 5	18(3)	12(2)	495(81)	88(14)	613(100)
Field 6	5(1)	0(0)	704(89)	76(10)	785100
Field 7	81(11)	18(2)	623(84)	21(3)	743(100)
Field 8	70(18)	9(2)	305(77)	14(3)	398(100)
Total cells(average%)	546(17.625)	163(4.625)	2872(68.875)	313(8.875)	3894(100)
StDV (for percentages)	12.6584	4.92284	18.2513	5.32535
Fgf2 (20 ng/ml)+CHIR(5 uM)
	Number of cells (% total cells)
	T+Sox2+	T+Sox2-	T-Sox2+	T-Sox2-	Total cells scored
Field 1	107(45)	85(36)	30(13)	14(6)	236(100)
Field 2	84(17)	374(74)	16(3)	31(6)	505(100)
Field 3	32(8)	299(71)	31(7)	60(14)	422(100)
Field 4	111(50)	90(41)	15(7)	6(2)	222(100)
Field 5	130(41)	101(32)	51(16)	36(11)	318(100)
Field 6	61(18)	184(54)	18(5)	75(23)	338(100)
Field 7	55(13)	235(58)	18(4)	100(25)	408(100)
Field 8	123(21)	348(60)	32(5)	81(14)	584(100)
Field 9	155(35)	208(46)	14(3)	72(16)	449(100)
Field 10	239(48)	166(34)	45(9)	43(9)	493(100)
Total cells(average%)	1097(29.6)	2090(50.6)	270(7.2)	518(12.6)	3975(100)
StDV (for percentages)	15.0346	14.375	4.11825	7.01712

## Sheet: Figure S4B
Figure S4
Panel B
	Graph S4B								Graph S4B
mEpiSC	Number of cells (% total cells)							hES	Number of cells (% total cells)
	48 hr								48 hr
	T+Sox2+	T+Sox2-	T-Sox2+	T-Sox2-	Total cells scored				T+Sox2+	T+Sox2-	T-Sox2+	T-Sox2-	Total cells scored
Field 1	43(86)	12(6)	1(2)	0(0)	50(100)			Field 1	97(64)	2(1)	45(30)	7(5)	151(100)
Field 2	46(70)	3(5)	11(17)	6(8)	66(100)			Field 2	136(80)	1(1)	29(17)	5(2)	171(100)
Field 3	37(52)	31(41)	0(0)	5(7)	73(100)			Field 3	69(58)	16(13)	28(24)	6(5)	119(100)
Field 4	77(93)	6(7)	0(0)	0(0)	83(100)			Field 4	277(69)	4(1)	108(27)	10(3)	399(100)
Field 5	93(96)	1(1)	0(0)	3(3)	97(100)			Field 5	142(70)	18(9)	39(19)	5(2)	204(100)
Field 6	50(53)	5(5)	7(7)	32(35)	94(100)			Field 6	202(61)	23(7)	100(30)	8(2)	333(100)
Field 7	99(94)	5(5)	0(0)	1(1)	105(100)			Field 7	81(40)	58(28)	30(15)	35(17)	204(100)
Field 8	50(57)	31(36)	0(0)	6(7)	87(100)			Total cells(average%)	1004(63.1428571428571)	122(8.57142857142857)	379(23.1428571428571)	76(5.14285714285714)	1581(100)
Field 9	70(24)	105(36)	2(1)	117(39)	294(100)			StDV (for percentages)	11.5441	9.03734	5.74279	4.99796
Field 10	48(79)	9(15)	3(5)	1(1)	61(100)
Field 11	55(82)	0(0)	11(16)	1(2)	67(100)
Field 12	67(97)	0(0)	2(3)	0(0)	69(100)
Field 13	53(92)	2(4)	2(4)	0(0)	57(100)			hES
Field 14	35(59)	12(20)	10(17)	2(4)	59(100)				Number of cells (% total cells)
Field 15	43(100)	0(0)	0(0)	0(0)	43(100)				72 hr
Total cells(average%)	866(75.6666666666667)	222(12.4666666666667)	49(4.73333333333333)	174(7.13333333333333)	1305(100)				T+Sox2+	T+Sox2-	T-Sox2+	T-Sox2-	Total cells scored
StDV (for percentages)	21.5365	13.7882	6.2978	12.0436				Field 1	130(55)	6(3)	98(42)	1(0)	235(100)
								Field 2	89(65)	36(26)	3(2)	8(7)	136(100)
mEpiSC	Number of cells (% total cells)							Field 3	76(32)	8(3)	120(50)	34(15)	238(100)
	72 hr							Field 4	150(83)	19(10)	5(3)	7(4)	181(100)
	T+Sox2+	T+Sox2-	T-Sox2+	T-Sox2-	Total cells scored			Field 5	216(43)	207(41)	64(13)	16(3)	503(100)
Field 1	54(30)	124(68)	0(0)	4(2)	182(100)			Field 6	162(57)	38(13)	51(18)	33(12)	284(100)
Field 2	83(61)	51(38)	2(1)	0(0)	136(100)			Field 7	135(55)	21(9)	55(22)	36(14)	247(!00)
Field 3	86(51)	47(28)	3(2)	34(19)	170(100)			Field 8	77(71)	5(5)	21(19)	6(5)	109(100)
Field 4	12(7)	109(60)	0(0)	61(33)	182(100)			Total cells(average%)	1035(57.625)	340(13.75)	417(21.125)	141(7.5)	1933(100)
Field 5	127(47)	131(48)	0(0)	13(5)	271(100)			StDV (for percentages)	14.8403	12.4373	15.9878	5.17204
Field 6	136(24)	212(38)	0(0)	215(38)	563(100)
Field 7	85(71)	29(24)	1(1)	4(4)	119(100)
Field 8	307(96)	13(4)	0(0)	0(0)	320(100)			hES
Field 9	41(50)	41(50)	0(0)	0(0)	82(100)				Number of cells (% total cells)
Field 10	237(36)	421(62)	0(0)	7(1)	665(100)				96 hr
Field 11	35(36)	61(62)	0(0)	2(2)	98(100)				T+Sox2+	T+Sox2-	T-Sox2+	T-Sox2-	Total cells scored
Field 12	124(42)	163(56)	0(0)	4(2)	292(100)			Field 1	164(47)	81(23)	40(12)	62(18)	347(100)
Field 13	250(75)	82(25)	0(0)	0(0)	332(100)			Field 2	56(26)	30(14)	99(46)	32(14)	217(100)
Field 14	97(64)	53(35)	1(1)	0(0)	151(100)			Field 3	326(45)	167(23)	93(13)	135(19)	721(100)
Total cells(average%)	1674(49.2857142857143)	1537(42.7142857142857)	7(0.428571428571429)	344(7.57142857142857)	3563(100)			Field 4	147(47)	104(33)	32(10)	33(10)	316(100)
StDV (for percentages)	22.1728	17.7741	0.6227	12.3792				Field 5	316(35)	140(15)	319(35)	129(15)	904(100)
								Field 6	275(36)	0(0)	467(61)	27(3)	769(100)
								Field 7	73(40)	9(5)	44(24)	55(31)	181(100)
mEpiSC	Number of cells (% total cells)							Total cells(average%)	1357(39.4285714285714)	531(16.1428571428571)	1094(28.7142857142857)	473(15.7142857142857)
	96 hr							StDV (for percentages)	7.14857	10.4803	18.0453	7.9949	3455(100)
	T+Sox2+	T+Sox2-	T-Sox2+	T-Sox2-	Total cells scored
Field 1	152(82)	29(16)	1(1)	1(1)	183(100)
Field 2	375(68)	85(15)	29(5)	66(12)	555(100)
Field 3	342(50)	141(21)	99(14)	104(15)	686(100)
Field 4	644(84)	60(8)	33(4)	28(4)	765(100)
Field 5	110(95)	2(2)	1(1)	2(2)	115(100)
Field 6	150(62)	71(29)	5(2)	15(7)	241(100)
Field 7	305(63)	7(1)	164(33)	21(3)	497(100)
Field 8	230(87)	21(8)	14(5)	0(0)	265(100)
Total cells(average%)	2308(73.875)	416(12.5)	346(8.125)	237(5.5)	3307(100)
StDV (for percentages)	14.3652	8.9861	10.1789	5.07445
